1 **Vectofusin-1–based T-cell transduction approach compared with RetroNectin-based**  
2 **transduction for generating murine chimeric antigen receptor T-cells**

3  
4 Romil Patel<sup>1†</sup>, Kartik Devashish<sup>1†</sup>, Shubhra Singh<sup>1</sup>, Pranay Nath<sup>1</sup>, Dev Gohel<sup>1</sup>, Rishika  
5 Prasad<sup>2</sup>, Manisha Singh<sup>1#</sup>, Neeraj Saini<sup>2,3#</sup>

6  
7 <sup>1</sup>Department of Lymphoma and Myeloma, The University of Texas MD Anderson Cancer  
8 Center, Houston, Texas, USA

9 <sup>2</sup>Department of Genomic Medicine, The University of Texas MD Anderson Cancer Center,  
10 Houston, Texas, USA

11 <sup>3</sup>Department of Stem Cell Transplantation and Cellular Therapy, The University of Texas  
12 MD Anderson Cancer Center, Houston, Texas, USA

13  
14 †These authors have contributed equally to this work and share first authorship.

15 #These authors have contributed equally to this work and share senior authorship.

16  
17 **Corresponding Author:** Neeraj Saini, Department of Stem Cell Transplantation and  
18 Cellular Therapy, 1515 Holcombe Blvd, Houston, TX 77479, USA; Email:

19 [nsaini@mdanderson.org](mailto:nsaini@mdanderson.org)  
20  
21

22 **Keywords:** Chimeric antigen receptor T-cells, transduction, mouse, Vectofusin-1,  
23 Retronectin

24  
25 **Abstract**

26 Gene transfer into human and murine T-cells using viral-based approaches has several  
27 promising therapeutic applications including the production of chimeric antigen receptor T-  
28 cell (CAR-T) therapy. The generation of murine CAR-T is paramount to test and validate  
29 immunocompetent mouse models for CAR-T therapy. Several viral transduction enhancers  
30 already exist for gene therapy with few limitations. In this study, we tested vectofusin-1, a  
31 short cationic peptide, as a soluble transduction enhancer for gammaretroviral transduction  
32 for the generation of anti-CD19 murine CAR-T. We found that in comparison to Retronectin,  
33 Vectofusin-1 is an equally optimal transduction enhancer for the generation of murine CAR-  
34 T cells.

## 35 Introduction

36 Chimeric antigen receptors (CARs) are synthetic receptors containing a target binding  
37 domain usually derived from a single-chain variable fragment of an antibody, a  
38 hinge/transmembrane region, and a truncated CD3 zeta cytoplasmic domain with or without  
39 a costimulatory domain<sup>1</sup>. CAR T-cell therapy represents the latest advance in the treatment  
40 of hematologic malignancies, with unprecedented response rates and survival outcomes  
41 seen in patients with relapsed refractory lymphomas<sup>2</sup>. Therefore, there is a need for  
42 production of CAR T-cells for both clinical use and laboratory research, particularly mouse  
43 validation studies.

44 Generation of CAR T-cells through viral transduction can be optimized by adding  
45 various culture additives such as cationic polymers (polybrene)<sup>3</sup>, dextran<sup>4</sup>, or cationic lipids  
46 (lipofectamine<sup>5</sup>). RetroNectin, derived from fibronectin, has recently been used to generate  
47 CAR T-cells for clinical applications<sup>6,7</sup>, and RetroNectin has primarily been used to generate  
48 mouse T-cells for in vivo testing. However, RetroNectin-based transduction protocols are  
49 cumbersome because RetroNectin must be surface-coated prior to use, and therefore, a  
50 new soluble additive capable of enhancing infection is needed.

51 Vectofusin-1, a new cationic amphipathic peptide, is a soluble additive that has been  
52 successfully used for transduction of human T-cells; however, this approach has not been  
53 tested for generation of murine CAR T-cells. The goal of the current study was to determine  
54 whether a novel conjunction protein peptide, such as Vectofusin-1, can achieve a similar  
55 transduction efficiency to that of RetroNectin for generation of CAR T-cells in mice. We  
56 have compared the Vectofusin-1–based approach with a more traditional RetroNectin  
57 protocol, providing a step-by-step approach to generate murine CAR T-cells using both  
58 approaches.

## 60 Materials and Equipment

- 61 • RetroNectin (Takara Bio, Catalog No. T100B)
- 62 • Vectofusin-1 (Miltenyi Biotec, Catalog No. 130-111-163)
- 63 • EasySep Mouse T-Cell Isolation Kit (StemCell, Catalog No. 19851)
- 64 • Purified anti-mouse CD3 $\epsilon$  antibody (Biolegend, Catalog No. 100302)
- 65 • Purified anti-mouse CD28 antibody (Biolegend, Catalog No. 102102)
- 66 • EasySep Buffer (StemCell, Catalog No. 20144)
- 67 • Non–tissue culture treated 6-well plates
- 68 • C57Bl6 mice
- 69 • Complete RPMI (cRPMI): RPMI 1640 medium, 10% fetal bovine serum, 100 IU/mL  
70 penicillin, 1 $\mu$ M sodium pyruvate, 10mM HEPES, 2.5 $\mu$ M  $\beta$ -mercaptoethanol (added  
71 fresh when changing medium), and 2mM L-glutamine
- 72 • Phosphate-buffered saline–bovine serum albumin (PBS–BSA): PBS, 0.5% BSA or  
73 FACS buffer (PBS + 2% fetal bovine serum)
- 74 • Magnet: we used the EasySep magnet, but others are suitable
- 75 • Recombinant murine interleukin (IL)-2 (Peprotech, Catalog No. 212-12)
- 76 • Frozen viral supernatant from transduced Phoenix-E cells that produce m1928z  
77 retrovirus.

## 79 Methods

### 80 *Day 1: Mouse T-cell isolation and activation*

81 Note: Mouse spleens can be frozen in fetal bovine serum + 5% DMSO for future use as  
82 needed.

### 83 T-cell isolation

- 84 1. Kill mouse and saturate with 70% ethanol. Make a left lateral incision below the rib  
85 cage and collect the spleen. Store spleens in cRPMI.
- 86 2. Place the spleen onto a 40 $\mu$ M cell strainer placed onto a 50-mL conical tube loaded  
87 with 10 mL cRPMI. Using the plunger end of a 1-mL syringe, gently push the spleen  
88 through the strainer into the 50-mL tube. Rinse the cell strainer with 10 mL of cRPMI  
89 to ensure all spleen cells pass through the strainer into the conical tube.
- 90 3. Spin cells at 1500 rpm for 5 minutes, discard supernatant, and wash the pellet once  
91 with 5 mL PBS.
- 92 4. Resuspend pellet in 5 mL red blood cell lysis buffer.
- 93 5. Incubate at room temperature for 2 minutes.
- 94 6. Stop red blood cell lysis with 20 mL of cRPMI. Centrifuge and wash once with PBS.
- 95 7. Count cells and prepare cell suspension at a concentration of  $1 \times 10^8$  cells/mL in  
96 EasySep buffer.
- 97 8. Add normal rat serum from the EasySep Mouse T-cell Isolation Kit (StemCell  
98 Technologies) and Isolation Cocktail, both at 50  $\mu$ L/mL of splenocytes.
- 99 9. Mix well and incubate at room temperature for 10 minutes.
- 100 10. Vortex EasySep Streptavidin RapidSpheres for 30 seconds and add to the antibody–  
101 splenocyte mixture at 75  $\mu$ L/mL of splenocytes.
- 102 11. Mix well and incubate at room temperature for 2.5 minutes.
- 103 12. Add EasySep buffer to the splenocyte suspension to a total volume of 2.5 mL and  
104 mix by gently pipetting up and down.
- 105 13. Place the tube into a magnet and set aside at room temperature for 2.5 minutes.
- 106 14. Pick up the magnet, invert, and pour off desired unbound T-cell fraction into a new  
107 tube.
- 108 15. Spin T-cells at 1500 rpm for 5 minutes, discard supernatant, and resuspend pellet in  
109 cRPMI to a final concentration of  $1 \times 10^7$  cells/mL.

#### 111 T-cell activation

- 112 1. Incubate anti-CD3 antibody at 5  $\mu$ g/mL and anti-CD28 antibody at 2  $\mu$ g/mL on a 6-  
113 well plate (5 mL/well) for 2 hours at 37 °C or overnight at 4 °C (seal the plate).
- 114 Note: Dynabeads Mouse T-Activator CD3/CD28 (Catalog No. 11456D) can also be used  
115 for mouse T-cell activation and expansion, with similar results and expansion.
- 116 2. Resuspend T-cells in cRPMI to a final concentration of  $1 \times 10^7$  cells/mL.
- 117 3. Aspirate monoclonal antibody solution from the plates and add 1 mL of T-cells per  
118 well.
- 119 4. Let cells grow overnight at 37 °C and 5% CO<sub>2</sub>.
- 120 5. For transduction with RetroNectin, prepare non–tissue culture treated plates by  
121 adding RetroNectin (1  $\mu$ g/ $\mu$ L; Takara Bio, Otsu, Japan) to enhance transduction  
122 efficiency. Add 90  $\mu$ L of RetroNectin with 6 mL PBS. Dispense 1 mL/well  
123 RetroNectin/PBS into non–tissue culture treated plates. Store the plates overnight at  
124 4 °C.

125 Note: The number of wells to be plated with RetroNectin depends on the number of T-  
126 cells harvested from the spleen. We prefer to use  $1 \times 10^7$  cells per well in 6-well plates.  
127 RetroNectin-coated plates can also be prepared on the day of transduction, but this  
128 requires incubation at room temperature for 2 hours, followed by blocking with PBS–  
129 BSA for 30 minutes and washing once with PBS before same-day use.

#### 131 *Day 2: First transduction*

132 Thaw the recombinant retrovirus supernatant in a 37 °C water bath and remove it from the  
133 bath immediately when thawed. Production of gamma-retrovirus production is detailed in  
134 the Notes section below.

135

#### 136 RetroNectin-based transduction

- 137 1. Remove RetroNectin/PBS and block with PBS–BSA for 30 minutes at room  
138 temperature.
- 139 2. Remove blocking buffer and wash plates once with PBS.
- 140 3. Add 3 mL of the viral supernatant to RetroNectin-coated wells.
- 141 4. Spin at 2000 × g for 1 hour at room temperature.
- 142 5. Harvest and centrifuge activated T-cells at 1500 rpm for 5 minutes.
- 143 6. Resuspend cells with cRPMI at 1 × 10<sup>7</sup> cells/mL and 80 IU/mL IL-2.
- 144 7. Distribute 1 mL of T-cell suspension to each well.
- 145 8. Spin plates at 2000 × g for 1 hour at room temperature.
- 146 9. Incubate plates in a tissue culture incubator at 37 °C (5% CO<sub>2</sub>).

147

#### 148 Vectofusin-1–based transduction (adapted from manufacturer’s instructions)

- 149 1. Thaw stock aliquot of Vectofusin-1 (1 mg/mL stock concentration) at room  
150 temperature. Vortex thoroughly before use.
  - 151 a. The required final concentration of Vectofusin-1 for transduction is 10 µg/mL  
152 in the total culture volume.
- 153 2. Add 10 µL of Vectofusin-1 to 3 mL of viral supernatant and pipette up and down.  
154 Note: we have used lower doses of Vectofusin-1, up to 10 µL, without compromising the  
155 transduction efficiency.
- 156 3. Immediately (within 10 minutes) add the mixture of viral supernatant and Vectofusin-  
157 1 to 1 mL of cell suspension (1 × 10<sup>7</sup> cells/mL) and pipette up and down.
- 158 4. Spin plates at 2000 × g for 2 hours at room temperature.
- 159 5. Incubate at 37 °C (5% CO<sub>2</sub>).
  - 160 a. To reach a higher transduction performance, centrifuge cell samples at 400 ×  
161 g for 2 hours at 32 °C followed by static incubation at 37 °C.

162

#### 163 *Day 3: Second transduction*

##### 164 RetroNectin transduction

- 165 1. Tilt plates and carefully remove most of media from each well, but be careful to not  
166 aspirate cells bound to plates at the bottom.
- 167 2. Add 3 mL of virus to each well.
- 168 3. Spin plates at 2000 × g for 2 hours at room temperature.
- 169 4. Incubate in a tissue culture incubator at 37 °C (5% CO<sub>2</sub>).

170

##### 171 Vectofusin-1 transduction

- 172 1. Add 10 µL of Vectofusin-1 to 3 mL of viral supernatant and pipette up and down.
- 173 2. Tilt plates and carefully remove most of the media from each well, but be careful to  
174 not aspirate cells bound to plates at the bottom.
- 175 3. Immediately (within 10 minutes) add the mixture of viral supernatant and Vectofusin-  
176 1 to each well and pipette up and down.
- 177 4. Spin plates at 2000 × g for 2 hours at room temperature.
- 178 5. Incubate at 37 °C (5% CO<sub>2</sub>).

179

#### 180 *Day 4-7: Expansion and analysis flow cytometry*

- 181 1. Collect cells by thoroughly pipetting up and down, spin at 1500 rpm for 5 minutes,  
182 and resuspend in 5 mL of cRPMI with 50 IU/mL IL-2 in a T25 flask.
- 183 2. Incubate in a tissue culture incubator at 37 °C (5% CO<sub>2</sub>).
- 184 3. T-cells can be expanded for up to 7 days without further activation. Fresh culture  
185 media can be added or exchanged if the media becomes yellow or the concentration  
186 of cells is more than 2 × 10<sup>6</sup> cells/mL.

#### 187 188 *Transduction efficiency analysis*

- 189 1. Harvest and centrifuge transduced T-cells at 1500 rpm for 5 minutes. Warm cRPMI  
190 before thawing frozen T-cells.
- 191 2. Wash once with FACS buffer.
- 192 3. Stain with Live/Dead dye and stain with the other appropriate markers: CD4, CD8,  
193 CD3, CD45.
- 194 4. After washing twice, cells can be immediately analyzed using flow cytometry.

#### 195 196 *Notes*

- 197 1. Activation beads can also be used for activation of T-cells; however, they are costly  
198 compared with coated antibody methods. We followed the manufacturer protocol,  
199 with a 1:1 bead-to-cell ratio. Also, activation beads must be removed from T-cells  
200 before analysis or experimental use by pipetting T-cells in a conical tube and  
201 thoroughly pipetting up and down to remove the T-cells sticking to beads. If the tube  
202 is exposed to a magnet for 2 minutes, the unbound T-cells can be decanted from the  
203 tube.
- 204 2. There are various protocols for transient production of gamma retrovirus from an  
205 ecotropic cell line. However, for large quantities of virus with similar titers, we  
206 recommend production of stable virus-producing cell lines, as reported by Li et al<sup>8</sup>.  
207 For our experiments, we obtained stable virus-producing Phoenix-Eco cell lines as a  
208 generous gift from Dr. Marco L. Davila's laboratory to generate gamma retrovirus.
- 209 3. Human IL-2 can be used for both mouse and human T-cells.

#### 210 211 *Statistical analysis*

212 A nonparametric two-tailed *t* test was used to evaluate variation between groups.  
213 Differences in proportions were evaluated using a two-sided Fisher exact test. For all  
214 statistical analyses,  $p \leq 0.05$  was considered statistically significant.

#### 215 216 **Results**

##### 217 *Transduction efficiency with activation beads compared with plated antibodies*

218 First, we sought to evaluate the activation of murine T-cells and transduction efficiency with  
219 beads compared with plated antibodies. We harvested mouse spleens ( $n = 3$ ) and murine  
220 T-cells were isolated as detailed in the protocol above.  $5 \times 10^6$  T-cells were collected and  
221 were individually activated with either the mouse T-cells activator beads or plated anti-  
222 CD3/CD28 antibodies. Subsequently, we performed RetroNectin-based transduction  
223 assays with same amount of harvested viral supernatants (3 mL) in each well. Because  
224 viral supernatant was obtained from stable virus-producing cell lines and the supernatant  
225 was pooled before transduction, we expected the viral titers to be similar between individual  
226 experiments and steps.

227 Our CAR plasmid vector is based on an SFG plasmid backbone with an anti-mouse CD19  
228 CAR sequence followed by a T2A and green fluorescent protein(GFP) sequence, as shown  
229 in Figure 1A. We evaluated the transduction efficiency in murine T cells by determining the  
230 expression of GFP using flow cytometry on a FITC channel. We found that in RetroNectin-

231 based transduction assays, similar transduction efficiency was generated with beads (mean  
232 = 60.40%, n = 3) as with plated anti-CD3/CD28 antibodies (mean = 55.4%, n = 3) using the  
233 T-cell activation methods shown in Figure 1B and 1C (p = 0.14, two-tailed unpaired *t* test).

234

#### 235 *Comparison of RetroNectin and Vectofusin-1 for generation of murine CAR T-cells*

236 Next, we compared RetroNectin with Vectofusin-1 as a transduction enhancer for  
237 generation of murine CAR T-cells. For direct comparison, we activated T-cells isolated from  
238 mouse spleens (n = 3) with plated anti-CD3/CD28 antibodies and did viral transduction on  
239 day 1 and day 2. We found that Vectofusin-1 generated lower transduction efficiency (mean  
240 = 43.33%, n = 3) than RetroNectin (mean = 55.57%, n = 3; p = 0.001, paired two-tailed *t*  
241 test; Figure 2).

242

#### 243 *CAR-T cells proliferation and expansion is optimal with Vectofusin-1*

244 Next, we also evaluated the absolute number of cells at day 5 after transduction with the  
245 help of Countess FL automated Cell Counters and computed the median fold expansion  
246 from the baseline. We found that by the end of day 5, fold expansion of total T-cells were  
247 significantly higher with Vectofusin-1 ( $1.9333 \pm 0.141$  fold) compared to Retronectin ( $1.4667$   
248  $\pm 0.0706$ ) transduction (p=0.008).

249

#### 250 **Discussion**

251 In our study, we compared Vectofusin-1 and RetroNectin as transduction enhancers for the  
252 generation of murine anti-CD19 CAR T-cells. We found that the vectofusin-1 generated  
253 lesser CAR-T transduction efficiency, as assessed by GFP expression, compared to  
254 Retronectin. However, the absolute number of CAR-T cells generated was approximately  
255 equal between the two groups due to higher expansion and proliferation of total T-cells  
256 under vectofusin-1. The reason for the increased total number of T-cells generated with  
257 vectofusin-1 is unclear to us. It is possible that Retronectin labeled plates adhere to T-cells  
258 more tightly after spin down post-transduction and probably limit their mobility and  
259 proliferation to a small extent. In conclusion, vectofusin-1 leads to optimal murine CAR-T  
260 production, like Retronectin, for performing in-vitro and in-vivo mouse validation studies.

261

262

---

263 Acknowledgements: We thank Erica Goodoff, Senior Scientific Editor in the Research Medical  
264 Library at The University of Texas MD Anderson Cancer Center, for editing this article.

265  
266  
267  
268  
269  
270  
271  
272  
273  
274  
275  
276  
277  
278  
279  
280  
281  
282  
283  
284  
285  
286  
287  
288  
289  
290  
291  
292  
293  
294  
295  
296  
297  
298  
299  
300  
301  
302  
303  
304  
305  
306  
307  
308  
309  
310  
311  
312



313 **References**

- 314 1. June CH, Sadelain M. Chimeric Antigen Receptor Therapy. *N Engl J Med.* 2018;379(1):64-  
315 73.
- 316 2. Neelapu SS, Locke FL, Bartlett NL, et al. Axicabtagene Ciloleucel CAR T-Cell Therapy in  
317 Refractory Large B-Cell Lymphoma. *N Engl J Med.* 2017;377(26):2531-2544.
- 318 3. Cornetta K, Anderson WF. Protamine sulfate as an effective alternative to polybrene in  
319 retroviral-mediated gene-transfer: implications for human gene therapy. *J Virol Methods.*  
320 1989;23(2):187-194.
- 321 4. Vogt PK. DEAE-dextran: enhancement of cellular transformation induced by avian sarcoma  
322 viruses. *Virology.* 1967;33(1):175-177.
- 323 5. Hodgson CP, Solaiman F. Virosomes: cationic liposomes enhance retroviral transduction.  
324 *Nat Biotechnol.* 1996;14(3):339-342.
- 325 6. Moritz T, Dutt P, Xiao X, et al. Fibronectin improves transduction of reconstituting  
326 hematopoietic stem cells by retroviral vectors: evidence of direct viral binding to chymotryptic  
327 carboxy-terminal fragments. *Blood.* 1996;88(3):855-862.
- 328 7. Moritz T, Patel VP, Williams DA. Bone marrow extracellular matrix molecules improve gene  
329 transfer into human hematopoietic cells via retroviral vectors. *J Clin Invest.* 1994;93(4):1451-1457.
- 330 8. Li G, Park K, Davila ML. Gammaretroviral Production and T Cell Transduction to  
331 Genetically Retarget Primary T Cells Against Cancer. *Methods Mol Biol.* 2017;1514:111-118.  
332

333

334 **Figures**

A. CAR construct

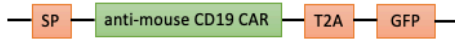

B. Flow cytometry-based detection of CAR expression by GFP

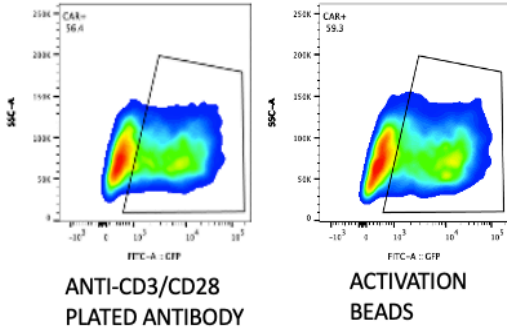

A. Bar graph showing percentage of CD3+GFP+ positive cells

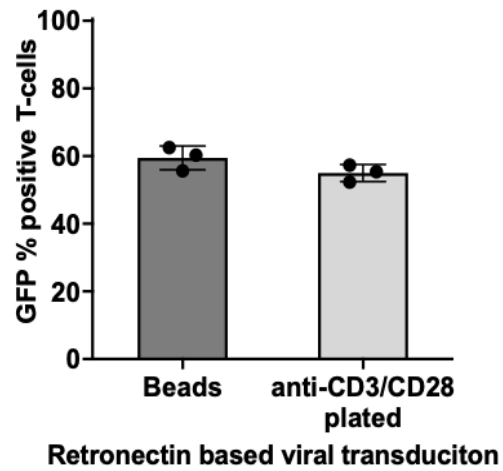

335

336 **Figure 1. Comparison of anti-CD3/CD28 plated antibodies with a bead-based**  
337 **activation method for generation of murine anti-CD19 chimeric antigen receptor**  
338 **(CAR) T-cells. (A)** Pictorial representation of CAR vector with a green fluorescent protein  
339 **(GFP)** segment inserted after a flanking T2A sequence. **(B)** Flow cytometry detection of  
340 **CAR** transduction efficiency for bead-based and antibody-based activation. **(C)** Bar graph  
341 showing percentages of CD3+GFP+ cells in RetroNectin-based viral transduction assays  
342 using beads or plated antibodies for activation.  
343

344

A. Bar graph showing percentage of CD3+GFP+ positive cells

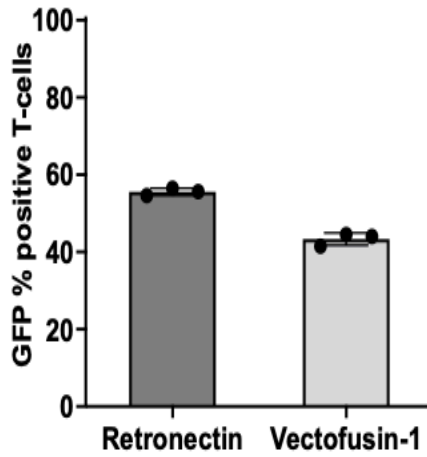

B. Flow cytometry-based detection of CAR expression by GFP

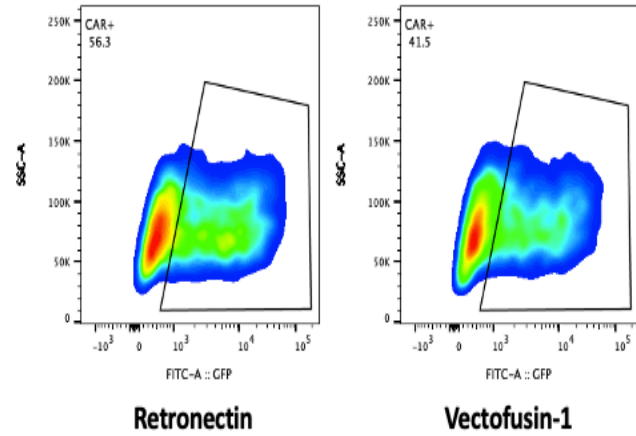

345

346 **Figure 2. Comparison of Vectofusin-1 with RetroNectin as transduction enhancers**  
347 **for generation of murine chimeric antigen receptor (CAR) T-cells. (A)** Bar graph  
348 showing percentages of green fluorescent protein (GFP)-expressing T-cells. **(B)** Flow  
349 cytometry representation of CAR transduction efficiency with RetroNectin and Vectofusin-1.
